# Supplementary material for: Lipolysis-Stimulated Lipoprotein Receptor Acts as Sensor to Regulate ApoE Release in Astrocytes
Source: MDPI journal article supplement (doi:10.3390/ijms23158630), 2022-08-03
Supplement: s1 [file s1]

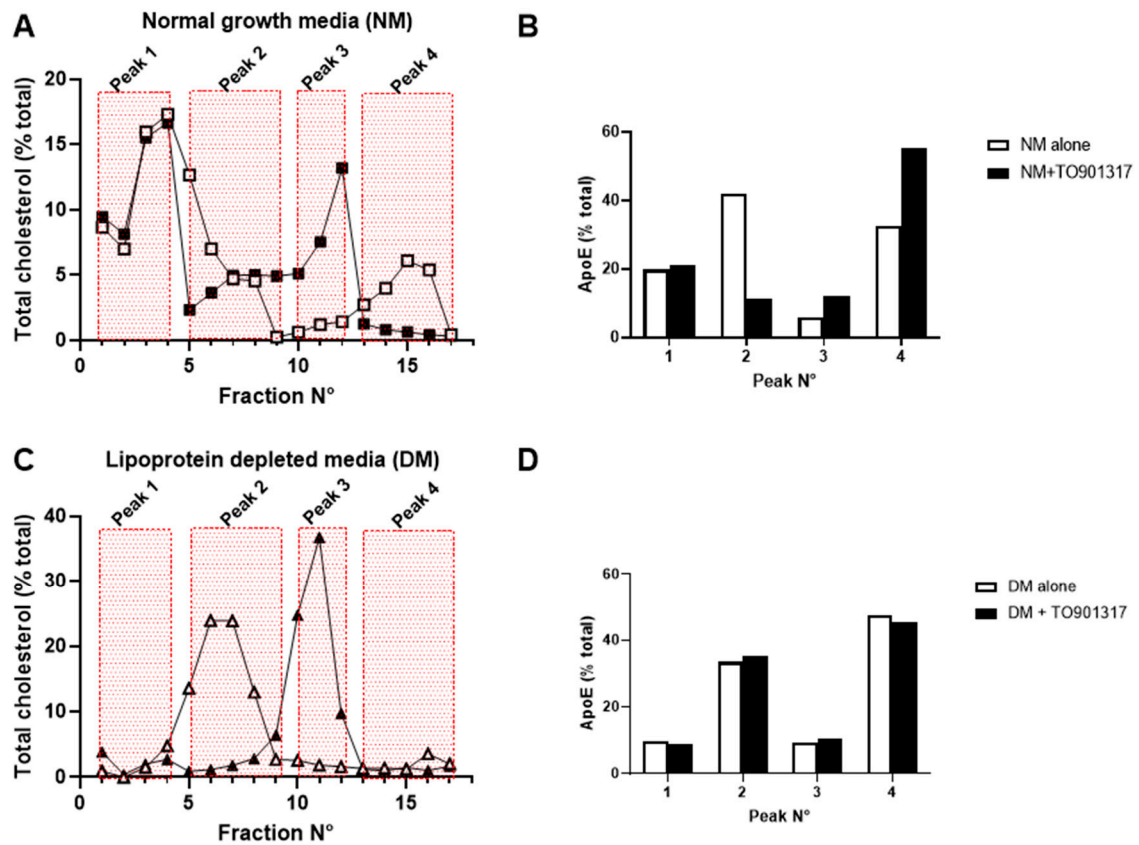

**Supplementary Figure S1.** Lipoprotein profiles in cell culture media after treatment of astrocytes with T0901317. Cells were incubated 8h at 37°C in the absence (open symbols) or presence (closed symbols) of 1  $\mu$ M T0901317 (see **Figure 4**). Cell culture media was collected, concentrated and fractionated by gel filtration chromatography as described in Materials and Methods. A and C) Relative cholesterol levels (% of total) in each fraction are shown (means are shown for  $n = 2$  per group). B and D) Relative ApoE levels (% of total) are shown for pooled fractions as indicated (means are shown for  $n = 2$  per group).
